# Supplementary material for: Measurement report: Oxidation potential of water-soluble aerosol components in the south and north of Beijing
Source: Copernicus journal article supplement (doi:10.5194/acp-24-13219-2024), 2024-11-29
Supplement: Supplementary file 1 [file acp-24-13219-2024-supplement.pdf]

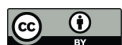

*Supplement of*

## **Measurement report: Oxidation potential of water-soluble aerosol components in the south and north of Beijing**

**Wei Yuan et al.**

*Correspondence to:* Ru-Jin Huang ([rujin.huang@ieecas.cn](mailto:rujin.huang@ieecas.cn)) and Huinan Yang ([yanghuinan@usst.edu.cn](mailto:yanghuinan@usst.edu.cn))

The copyright of individual parts of the supplement might differ from the article licence.

## 1 **Calculation of absorption coefficient of BrC**

2 The light absorption of water-soluble light-absorbing organic compounds (also known  
3 as brown carbon, BrC) were measured by an UV-Vis spectrophotometer equipped  
4 with a liquid waveguide capillary cell. During the measurement, the system was  
5 cleaned with ultrapure water ( $> 18.2 \text{ M}\Omega \text{ cm}$ ) after each sample analysis. After  
6 cleaning, for instrument calibration, the baseline was zeroed using the Spectra-Suite  
7 software so that zero absorption was recorded at all wavelengths for ultrapure water.

8 The light absorption data of BrC measured by the UV-Vis spectrophotometer  
9 equipped with a liquid waveguide capillary cell can be converted to the absorption  
10 coefficient (Abs) ( $\text{M m}^{-1}$ ) according to the following formula:

$$11 \text{ Abs}_{\lambda} = (A_{\lambda} - A_{700}) \times \frac{V_1}{V_a \times L} \times \ln(10) \quad (\text{S1})$$

12 where  $\text{Abs}_{\lambda}$  is Abs of BrC at  $\lambda$  nm,  $A_{700}$  is the absorption at 700 nm, serving as a  
13 reference to account for baseline drift,  $V_1$  is the volume of water that the filter was  
14 extracted into,  $V_a$  is the volume of sampled air, and  $L$  is the optical path length (0.94  
15 m). A factor of  $\ln(10)$  is used to convert the log base 10 (recorded by UV-Vis  
16 spectrophotometer) to a natural logarithm to provide a base-e absorption coefficient.

## 17 18 **ICP-MS analysis**

19 For ICP-MS analysis, a seven-point calibration curve (i.e., 1, 2, 5, 10, 20, 50, 100  $\mu\text{g}$   
20  $\text{L}^{-1}$ ) was established for each targeted element, and the regression coefficients for all  
21 elements were  $> 0.999$ . For the analysis,  $^{103}\text{Rh}$  and  $^{185}\text{Re}$  were added as internal  
22 standards at a concentration of 10  $\mu\text{g L}^{-1}$  in 2%  $\text{HNO}_3$ . At least one blank sample was  
23 analyzed for every 10 ambient samples, following the same procedures as for ambient  
24 samples. All data reported in this study were corrected for the blanks. The accuracy  
25 was estimated by analyzing the reference material GBW07406 (GSS-6). The  
26 differences between the measured and certified values ranged from -20% to 15% for  
27 the fourteen elements.

## 28 29 **GC-MS analysis**

30 Half of a 47 mm filter sample was ultrasonically extracted with a mixture of  
31 dichloromethane and methanol (2:1, v/v) for 15 min and repeated three times. The  
32 extracts were purified by quartz wool packed in a Pasteur pipette and then evaporated  
33 with a rotary evaporator to ~ 0.5 mL and dried with a gentle stream of nitrogen. Then,  
34 50  $\mu$ L of N,N-bis(trimethylsilyl)trifluoroacetamide (BSTFA-TMCS; Fluka Analytical,  
35 99 %) and 10  $\mu$ L of pyridine were added and heated for 3 h at 70 °C for silylation.  
36 After reaction, 140  $\mu$ L of n-hexane was added to dilute the derivatives. Finally, a 2  $\mu$ L  
37 aliquot of the derivatized extracts was introduced into the GC–MS (Agilent  
38 Technologies, Santa Clara, CA, USA), which was equipped with a DB-5MS column  
39 (30 m  $\times$  0.25 mm i.d., 0.25  $\mu$ m film thickness, J&W Scientific), an electron impact  
40 (EI) ionization source (70 eV) and a GC inlet of 280 °C. The GC oven temperature  
41 was held at 50 °C for 2 min, ramped up to 120 °C at a rate of 15 °C min<sup>-1</sup> and finally  
42 reached 300 °C at a rate of 5 °C min<sup>-1</sup> (held for 16 min). For the quantification of  
43 target organic compounds, an external standard method was used through daily  
44 calibration with working standard solutions. Also, for every 10 samples, a procedural  
45 blank and a spiked sample (i.e., ambient sample spiked with known amounts of  
46 standards) were measured to check the interferences and recoveries. The measured  
47 recoveries were > 80 %, except for phthalic acid (~ 70%), and the relative standard  
48 deviations (RSDs) were < 10 % for measured organic compounds. The method  
49 detection limits were 0.04-0.1 ng m<sup>-3</sup> for nonpolar compounds and 0.06-0.2 ng m<sup>-3</sup> for  
50 polar compounds.

51

## 52 **PMF analysis**

53 The PMF receptor model has been widely used to quantify the sources of PM<sub>2.5</sub>  
54 oxidative potential. In this study, the concentrations and uncertainties of 14 trace  
55 elements, 8 organic markers and DTT<sub>v</sub> were input into PMF model. The uncertainties  
56 of species were calculated following Liu et al. (2017). For species with concentrations  
57 less than the method detection limit (MDL), the concentrations were replaced as  
58 MDL/2 and the uncertainties (Unc) were calculated by the following equation:

59 
$$\text{Unc} = \frac{5}{6} \times \text{MDL} \quad (\text{S2})$$

60 For species with concentrations larger than the MDL, the uncertainties were  
61 calculated as the MDL and a relative error (20%) summed in quadrature,

62 
$$\text{Unc} = \sqrt{(\text{Error Fraction} \times \text{concentration})^2 + (0.5 \times \text{MDL})^2} \quad (\text{S3})$$

63 All data input into PMF model has a signal-to-noise ratio (S/N) greater than 2. PMF  
64 model is based on the following equation:

65 
$$x_{ij} = \sum_{k=1}^p g_{ik} f_{kj} + e_{ij} \quad (\text{S4})$$

66 Where  $x_{ij}$  refers to the concentration of the  $i_{\text{th}}$  sample and the  $j_{\text{th}}$  substance;  $p$  represent  
67 the number of factors;  $g_{ik}$  is the relative contribution of factor  $k$  to  $i_{\text{th}}$  sample;  $f_{kj}$  refers  
68 to the profile factor of each source for the  $j_{\text{th}}$  substance, and  $e_{ij}$  is the residual error for  
69 the  $i_{\text{th}}$  sample and the  $j_{\text{th}}$  substance. PMF solves equation S3 and derive the most  
70 appropriate non-negative factor profiles and contributions by minimizing the  
71 objective function (Q):

72 
$$Q = \sum_{i=1}^n \sum_{j=1}^m \left( \frac{e_{ij}}{u_{ij}} \right)^2 \quad (\text{S5})$$

73 Where  $n$  refers to the number of samples;  $m$  is the number of species, and  $u_{ij}$  is the  
74 uncertainty of the measured concentration for the  $i_{\text{th}}$  sample and the  $j_{\text{th}}$  specie.

75 In this study, the PMF solutions from five to seven factors were examined, the oil  
76 factor mixed with vehicle emissions factor in the five-factor solution, and there was  
77 no new reasonable factor when increasing the factor number above 6 in the PMF  
78 analysis (Figure S6). Therefore, the six-factor solution was adopted (Figure S7). The  
79  $Q/Q_{\text{exp}}$  value for six-factor solution was below than four, which is acceptable.

80

81

82

83

84

85

86 **Table S1.**  $F$  matrix elements constrained in the ME-2/chemical species 6 factors  
 87 solution. The 0 value denote the  $f_{h,j}$  values constrained in ME-2, while hyphens denote  
 88 unconstrained elements.

| Species      | Biomass<br>burning | Coal<br>Burning | Traffic-related | Secondary<br>Formation | Dust | Oil<br>combustion |
|--------------|--------------------|-----------------|-----------------|------------------------|------|-------------------|
| DTTv         | -                  | -               | -               | -                      | -    | -                 |
| Ti           | -                  | -               | -               | 0                      | -    | -                 |
| V            | -                  | -               | -               | 0                      | -    | -                 |
| Cr           | -                  | -               | -               | 0                      | -    | -                 |
| Mn           | -                  | -               | -               | 0                      | -    | -                 |
| Fe           | -                  | -               | -               | 0                      | -    | -                 |
| Co           | -                  | -               | -               | 0                      | -    | -                 |
| Ni           | -                  | -               | -               | 0                      | -    | -                 |
| Cu           | -                  | -               | -               | 0                      | -    | -                 |
| Zn           | -                  | -               | -               | 0                      | -    | -                 |
| As           | -                  | -               | -               | 0                      | -    | -                 |
| Sr           | -                  | -               | -               | 0                      | -    | -                 |
| Cd           | -                  | -               | -               | 0                      | -    | -                 |
| Ba           | -                  | -               | -               | 0                      | -    | -                 |
| Pb           | -                  | -               | -               | 0                      | -    | -                 |
| Picene       | -                  | -               | -               | 0                      | 0    | -                 |
| Hopanes      | 0                  | -               | -               | 0                      | 0    | 0                 |
| Galactosan   | -                  | 0               | 0               | 0                      | 0    | 0                 |
| Mannosan     | -                  | 0               | 0               | 0                      | 0    | 0                 |
| Levoglucosan | -                  | 0               | 0               | 0                      | 0    | 0                 |
| <i>o</i> -ph | 0                  | 0               | 0               | -                      | 0    | 0                 |
| <i>m</i> -ph | 0                  | 0               | 0               | -                      | 0    | 0                 |
| <i>p</i> -ph | 0                  | 0               | 0               | -                      | 0    | 0                 |

89

90

91

92

93

94

95

96

97

98

99 **Table S2.** Average values and standard deviation (Std) of measured parameters in the  
 100 southern and northern of Beijing.

| Compounds                                               | South   |       | North   |      |
|---------------------------------------------------------|---------|-------|---------|------|
|                                                         | Average | Std   | Average | Std  |
| PM <sub>2.5</sub> (µg m <sup>-3</sup> )                 | 122     | 49    | 62      | 28   |
| DTTv (nmol min <sup>-1</sup> m <sup>-3</sup> )          | 3.9     | 0.9   | 3.5     | 1.2  |
| DTTm (pmol min <sup>-1</sup> µg <sup>-1</sup> )         | 36      | 14    | 65      | 28   |
| WSOC (µg m <sup>-3</sup> )                              | 8.1     | 5.0   | 4.0     | 2.0  |
| Abs <sub>365</sub> (M m <sup>-1</sup> )                 | 20      | 13    | 6.8     | 5.4  |
| 4-nitrophenol (4NP) (ng m <sup>-3</sup> )               | 62      | 40    | 21      | 13   |
| 2-methyl-4-nitrophenol (2M4NP) (ng m <sup>-3</sup> )    | 25      | 17    | 7.7     | 4.7  |
| 3-methyl-4-nitrophenol (3M4NP) (ng m <sup>-3</sup> )    | 22      | 16    | 7.1     | 4.0  |
| 4-nitrocatechol (4NC) (ng m <sup>-3</sup> )             | 58      | 45    | 13      | 18   |
| 3-methyl-5-nitrocatechol (3M5NC) (ng m <sup>-3</sup> )  | 37      | 28    | 7.0     | 8.3  |
| 4-methyl-5-nitrocatechol (4M5NC) (ng m <sup>-3</sup> )  | 23      | 19    | 4.2     | 4.6  |
| 4-nitro-1-naphthol (4N1N) (ng m <sup>-3</sup> )         | 12      | 8.2   | 3.1     | 3.0  |
| Picene (ng m <sup>-3</sup> )                            | 6.3     | 4.7   | 3.2     | 2.8  |
| Hopanes (ng m <sup>-3</sup> )                           | 13.7    | 9.9   | 2.3     | 1.5  |
| Galactosan (ng m <sup>-3</sup> )                        | 61.8    | 45.1  | 6.0     | 4.6  |
| Mannosan (ng m <sup>-3</sup> )                          | 37.4    | 29.7  | 4.1     | 2.8  |
| Levoglucosan (ng m <sup>-3</sup> )                      | 474.2   | 318.2 | 90.3    | 70.1 |
| Phthalic acid ( <i>o</i> -ph) (ng m <sup>-3</sup> )     | 69.8    | 62.7  | 28.4    | 32.2 |
| Isophthalic acid ( <i>m</i> -ph) (ng m <sup>-3</sup> )  | 2.6     | 2.9   | 0.7     | 0.6  |
| Terephthalic acid ( <i>p</i> -ph) (ng m <sup>-3</sup> ) | 85.1    | 57.8  | 12.6    | 10.5 |
| Total elements (ng m <sup>-3</sup> )                    |         |       |         |      |
| Ti                                                      | 200     | 98    | 131     | 64   |
| V                                                       | 4.1     | 2.0   | 2.9     | 1.4  |
| Cr                                                      | 24      | 4.9   | 17      | 3.7  |
| Mn                                                      | 80      | 27    | 56      | 20   |
| Fe                                                      | 1717    | 811   | 1267    | 574  |
| Co                                                      | 0.8     | 0.3   | 0.6     | 0.3  |
| Ni                                                      | 3.5     | 0.7   | 3.4     | 0.7  |
| Cu                                                      | 79      | 66    | 25      | 24   |
| Zn                                                      | 225     | 120   | 131     | 78   |
| As                                                      | 11      | 9.6   | 6.0     | 5.7  |
| Sr                                                      | 27      | 12    | 16      | 6.8  |
| Cd                                                      | 1.6     | 1.0   | 0.7     | 0.5  |
| Ba                                                      | 71      | 24    | 69      | 12   |
| Pb                                                      | 65      | 43    | 25      | 16   |

101

102

103

104 **Table S3.** DTT<sub>v</sub> values in the south and north of Beijing and their sources  
 105 contributions.

|                                                                                    | South | North |
|------------------------------------------------------------------------------------|-------|-------|
| DTT <sub>v</sub> (nmol min <sup>-1</sup> m <sup>-3</sup> )                         | 3.9   | 3.5   |
| Sources contribution to DTT <sub>v</sub> (%)                                       |       |       |
| Biomass burning                                                                    | 25    | 8     |
| Coal burning                                                                       | 15    | 20    |
| Traffic-related                                                                    | 39    | 52    |
| Secondary formation                                                                | 17    | 13    |
| Dust                                                                               | 2     | 3     |
| Oil combustion                                                                     | 2     | 4     |
| Sources contribution to DTT <sub>v</sub> (nmol min <sup>-1</sup> m <sup>-3</sup> ) |       |       |
| Biomass burning                                                                    | 0.98  | 0.29  |
| Coal burning                                                                       | 0.59  | 0.70  |
| Traffic-related                                                                    | 1.5   | 1.8   |
| Secondary formation                                                                | 0.67  | 0.46  |
| Dust                                                                               | 0.08  | 0.11  |
| Oil combustion                                                                     | 0.06  | 0.14  |

106

107

108

109

110

111

112

113

114

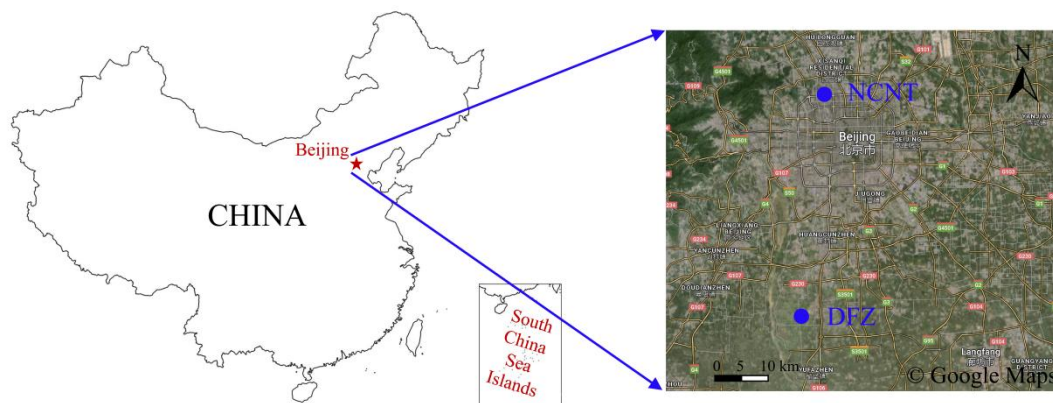

115

116 **Figure S1.** Map of the sampling sites. NCNT and DFZ are abbreviations for the north  
 117 (the National Center for Nanoscience and Technology) and south (the Dingfuzhuang  
 118 village, Daxing district) sites of Beijing, China, respectively. The left panel from  
 119 Ministry of Natural Resources of China, and the right panel from Google Maps.

120

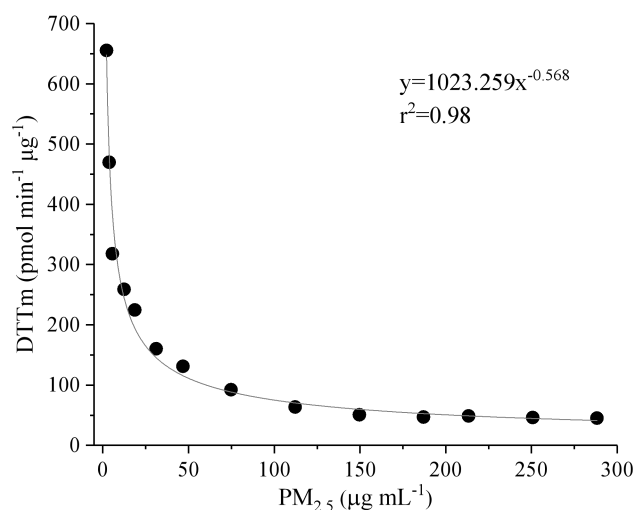

121

122 **Figure S2.** Measured DTTm response as a function of PM<sub>2.5</sub> concentration in the extraction  
 123 solution. The concentrations of soluble Cu and Mn in this sample were 23.7 and 23.4 ng m<sup>-3</sup>,  
 124 respectively.

125

126

127



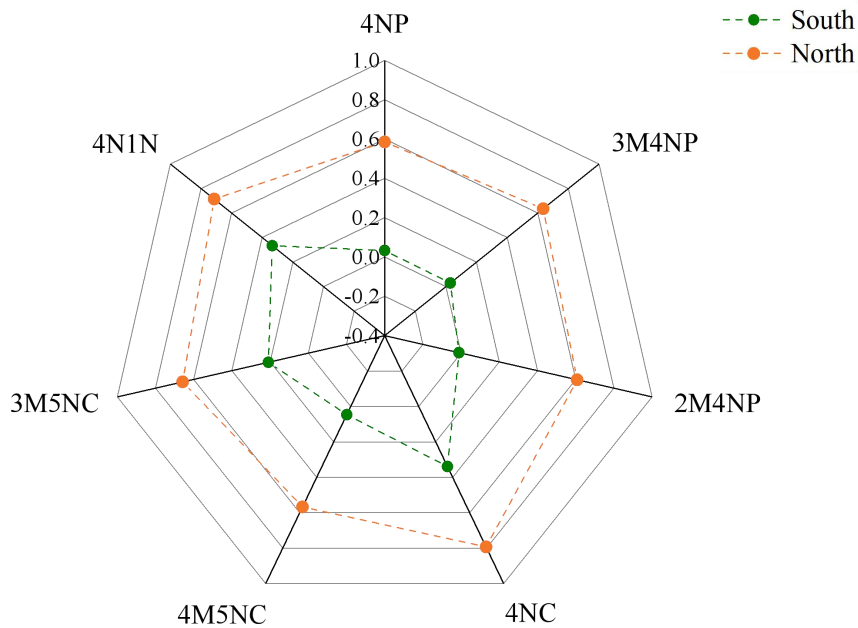

128

129 **Figure S3.** Correlation coefficients between DTTv and NACs in the south and north  
 130 of Beijing.

131

132

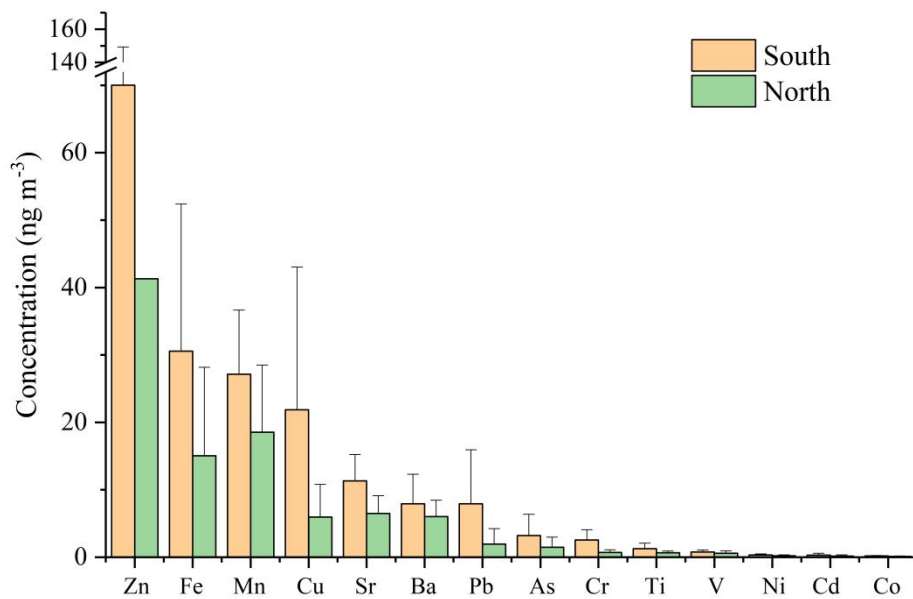

133

134 **Figure S4.** Concentrations of soluble elements in the south and north of Beijing.

135

136

137

138

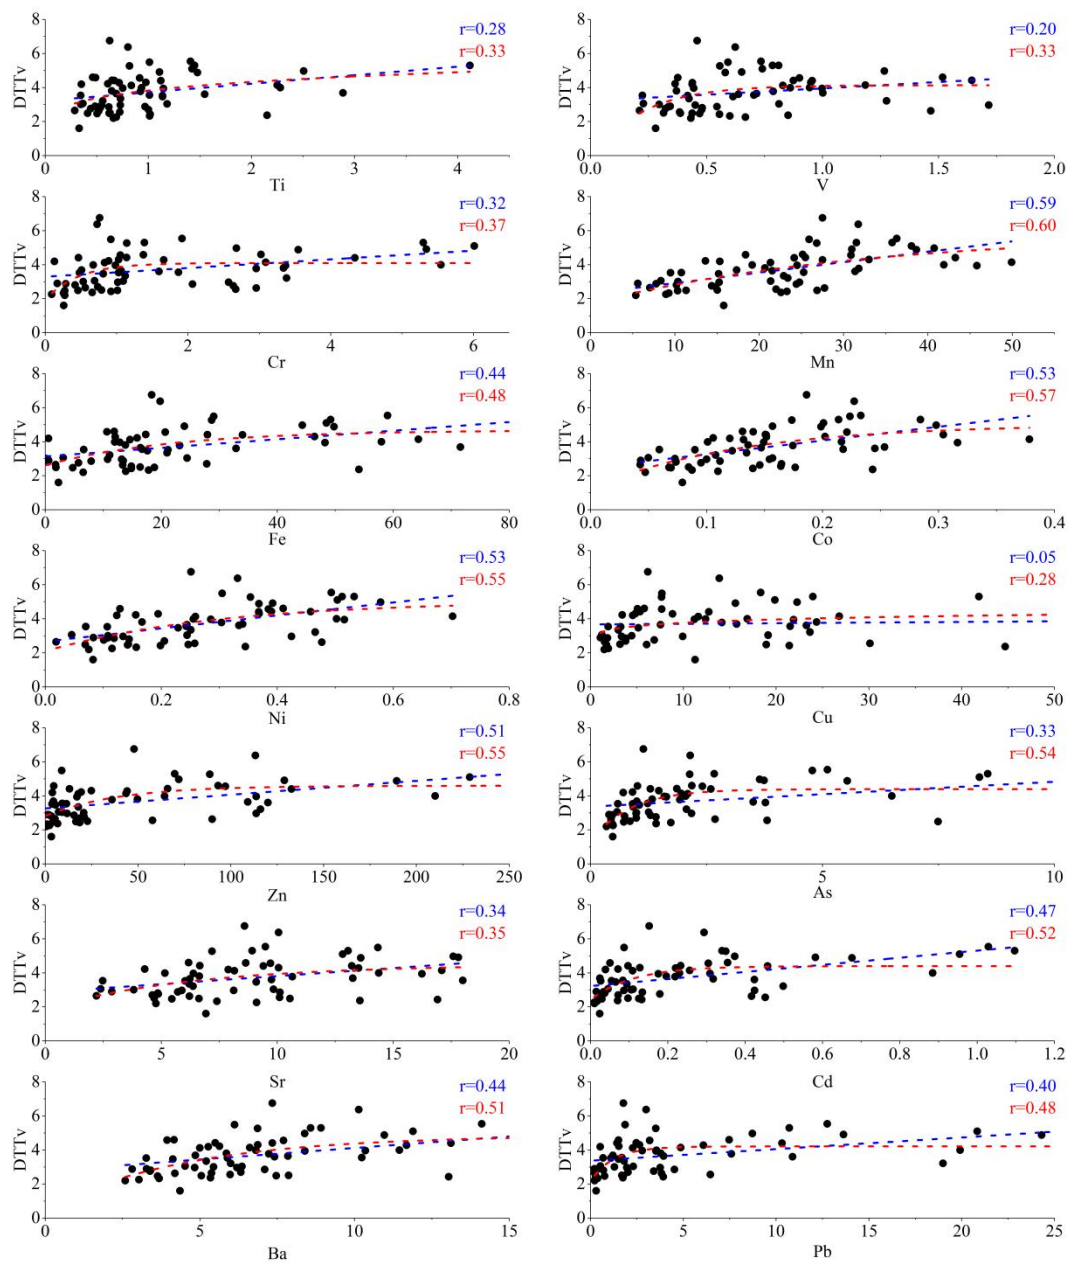

139

140 **Figure S5.** Relationship between soluble trace elements concentration ( $\text{ng m}^{-3}$ ) and

141  $\text{DTT}_v$  ( $\text{nmol min}^{-1} \text{m}^{-3}$ ).

142

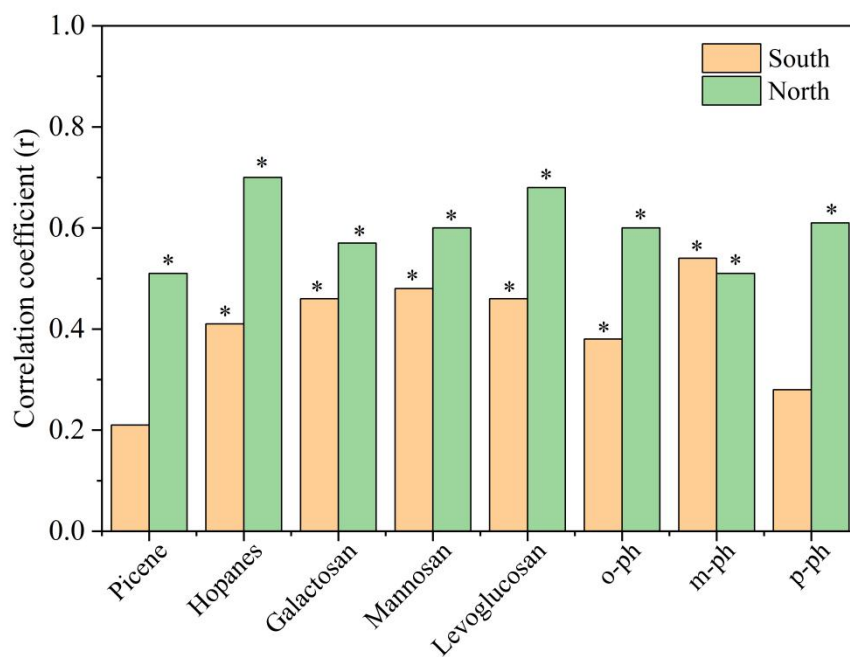

143

144 **Figure S6.** Correlation coefficients between DTTv and organic markers in the south  
 145 and north of Beijing (\* indicates correlation is significant at the 0.05 level).

146

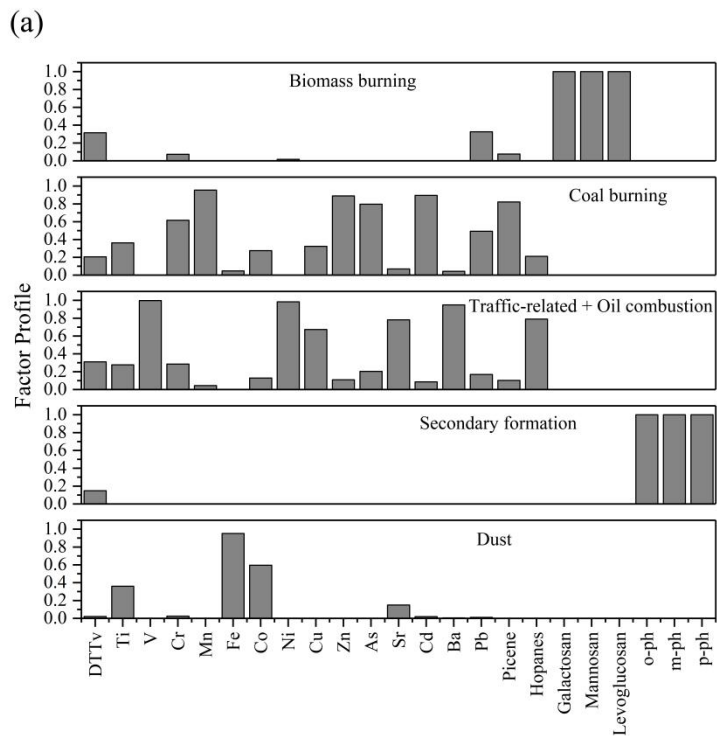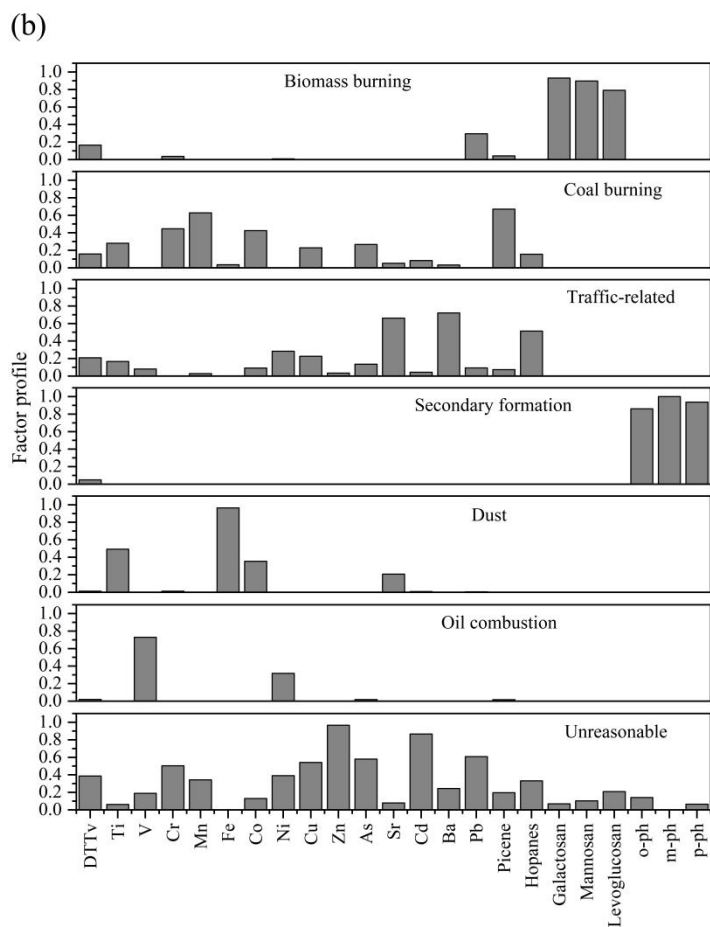

147

148 **Figure S7.** Factor profiles for the resolved (a) five-factor solution, and (b)

149 seven-factor solution.

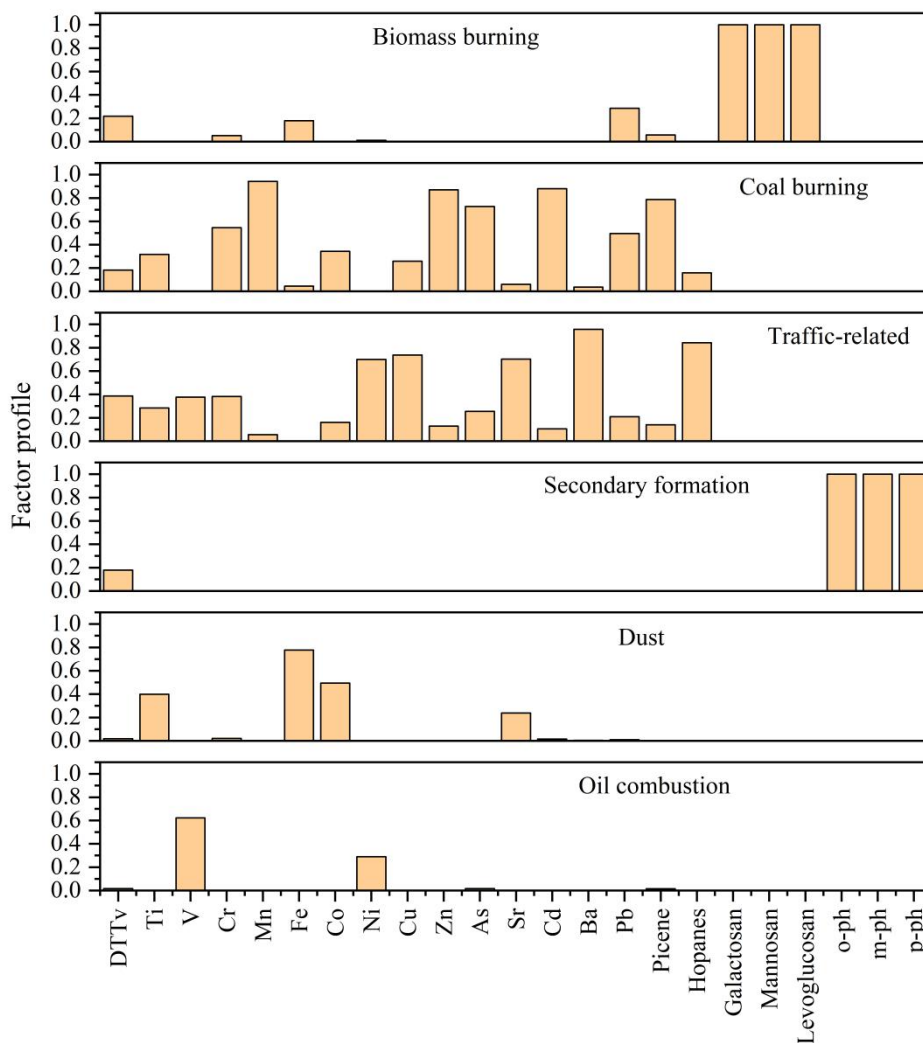

150

151 **Figure S8.** Factor profiles for the resolved six-factor solution.

152

### 153 References

154 Liu, Y., Yan, C. Q., Ding, X., Wang, X. M., Fu, Q. Y., Zhao, Q. B., Zhang, Y. H., Duan,  
 155 Y. S., Qiu, X. H., and Zheng, M.: Sources and spatial distribution of  
 156 particulate polycyclic aromatic hydrocarbons in Shanghai, China, *Sci. Total*  
 157 *Environ.*, 584-585, 307-317, <https://doi.org/10.1016/j.scitotenv.2016.12.134>,  
 158 2017.

159
